# Supplementary material for: Preparation of MoO3 QDs through combining intercalation and thermal exfoliation
Source: Royal Society of Chemistry journal article supplement (doi:10.1039/c6tc01656a), 2016-01-01
Supplement: c6tc01656a1.pdf [file c6tc01656a1.pdf]

## Supporting Information

### Preparation of MoO<sub>3</sub> QDs through combining intercalation and thermal exfoliation

Xiaolong Lu<sup>a</sup>, Rongguo Wang<sup>\*a</sup>, Fan Yang<sup>a</sup>, Weicheng Jiao<sup>a</sup>, Wenbo Liu<sup>b</sup>, Lifeng Hao<sup>\*a</sup> and Xiaodong He<sup>a</sup>

<sup>a</sup> Center for Composite Materials and Structures, Harbin Institute of Technology, Harbin, 150080, China. Fax: +86-0451-86402399; Tel: +86-0451-86402399; \*E-mail: hlf@hit.edu.cn, wrg@hit.edu.cn

<sup>b</sup> School of Materials Science and Engineering, Harbin Institute of Technology, Harbin, 150001, China.

#### 1. Characterization of MoO<sub>3</sub> commercial powder and MoO<sub>3</sub>-amine composites

The successful intercalation of MoO<sub>3</sub> by n-butylamine to prepare MoO<sub>3</sub>-amine composites was confirmed by SEM, XRD and IR spectra.

Before intercalation, commercial MoO<sub>3</sub> powder possessed layered structure (Fig. S1a and S1b). Its XRD spectrum (Fig. S2a) matched well with the orthorhombic MoO<sub>3</sub> (JCPDS card No. 05-0508) and showed the (020) peak at 12.8° (the corresponding space between adjacent layers was 6.9 Å). After intercalation, the formed MoO<sub>3</sub>-amine composites still showed layered structure, but were much ambiguous (Fig. S1c and S1d), indicating the composites have low crystallinity. This was verified by its corresponding XRD spectrum, since there was only one broad peak located at 6.3°, corresponding to the interlayer space of 13.9 Å which was a little smaller than the reported value.

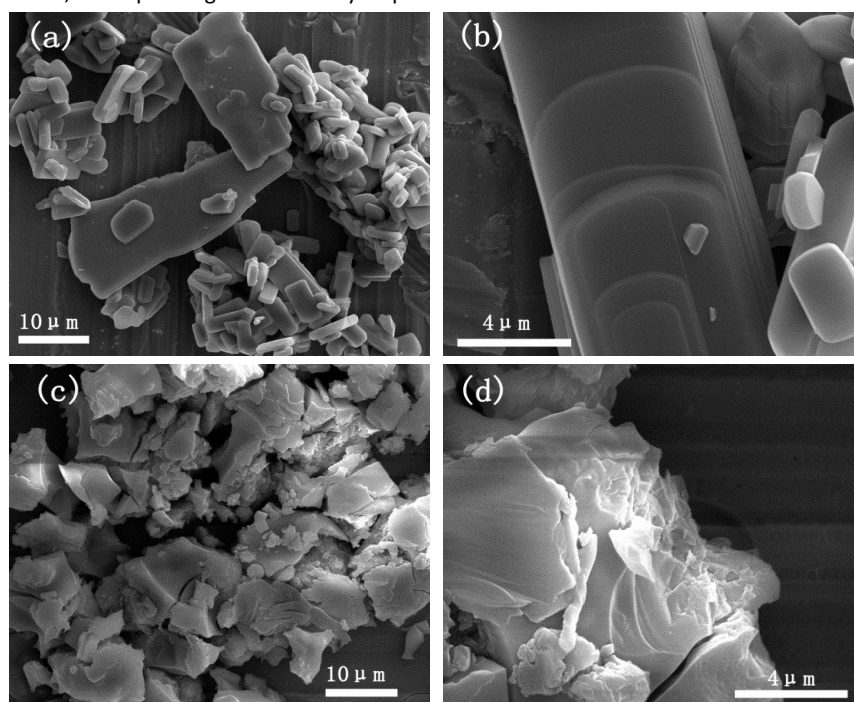

Fig. S1 The SEM images of MoO<sub>3</sub> commercial powder (a) (b) and the MoO<sub>3</sub>-amine composites obtained after intercalation (c) (d).

For the IR spectrum of commercial MoO<sub>3</sub>, the molybdenum oxide lattice vibrations appeared at 594, 868 and 995 cm<sup>-1</sup>, respectively (Fig. S2). After intercalation, because of the presence of alkylamines, the corresponding alkylamines bands arose. Two bands appeared at 2870 and 2960 cm<sup>-1</sup> could be attributed to the antisymmetric and symmetric -CH<sub>2</sub> stretching vibrations, respectively. Bands corresponding to -NH bending vibration and stretching vibration were observed at 1610 and 3440 cm<sup>-1</sup>. And at the same time, because of the interaction between the N-H from the amine and the Mo-O from the lattice, by means of a hydrogen bond, the vibration bands of MoO<sub>3</sub> all shifted to lower wave numbers as compared with the bands of commercial MoO<sub>3</sub>.

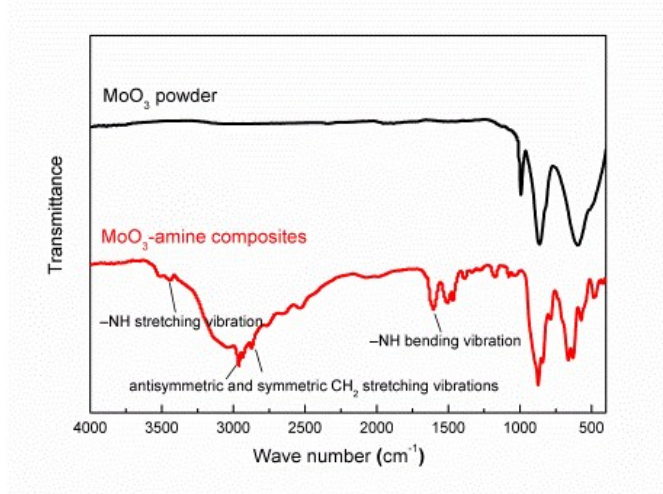

Fig. S2 The IR spectra of MoO<sub>3</sub> commercial powder and the MoO<sub>3</sub>-amine composites.

## 2. Characterization of the products left after thermal exfoliation under 460 °C for different time

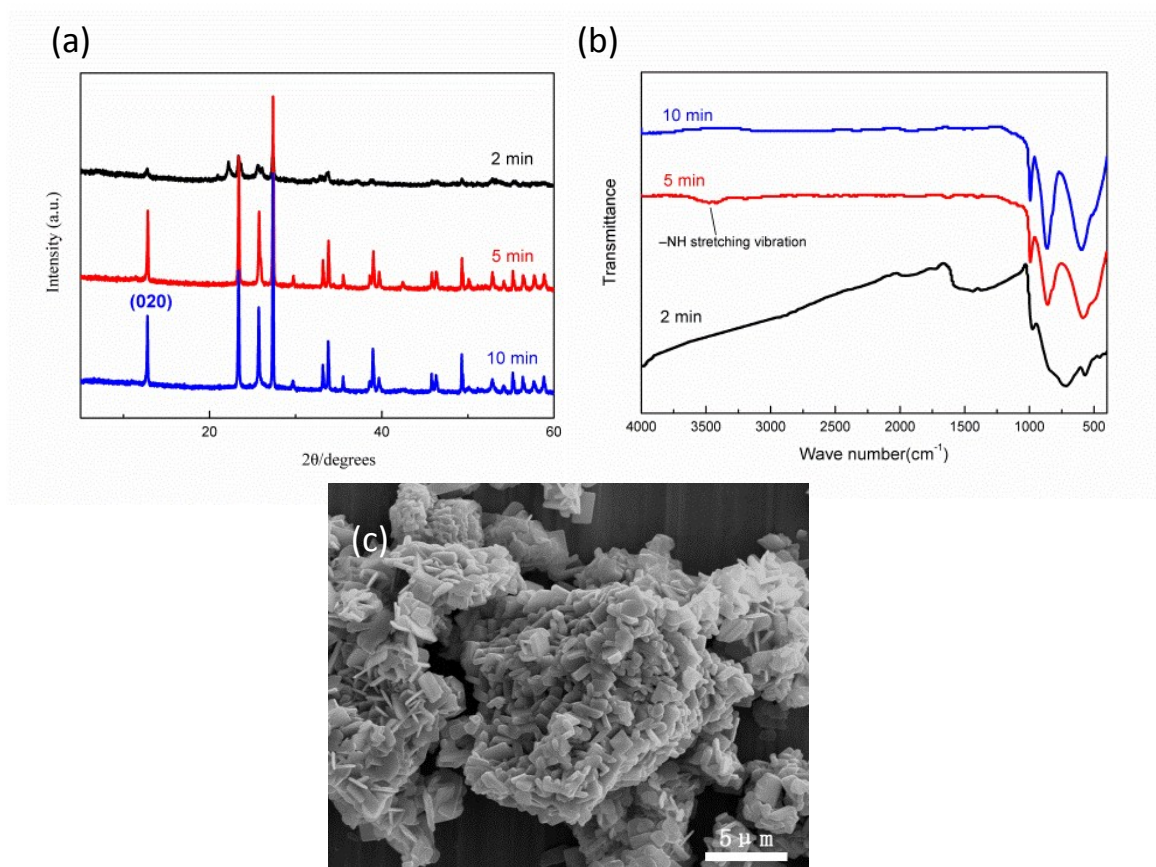

Fig. S3 The XRD patterns (a) and their corresponding IR spectra (b) of the products left after thermal exfoliation

under 460 °C for different time. The SEM image (c) of the products left after thermally treating under 460 °C for 10 min showed remarkable size decreasing compared to commercial MoO<sub>3</sub> powder as the outcome of the fragment of MoO<sub>3</sub> layers under the drastic increment of pressure.

### 3. QDs detached from rough MoO<sub>3</sub> particles after sonication

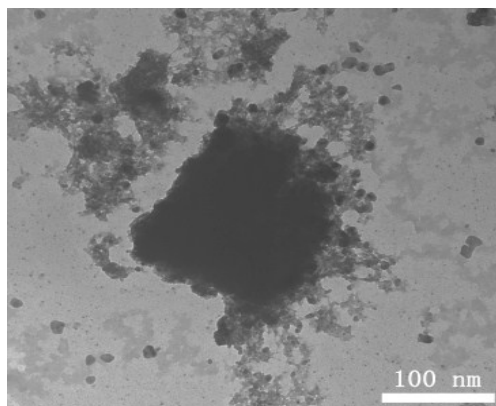

Fig. S4 The TEM image of particles obtained after sonication (thermal exfoliation under 460 °C for 10 min) showed that small particles including QDs were detached from rough MoO<sub>3</sub> particles.

### 4. Direct sonication of ground MoO<sub>3</sub> powder

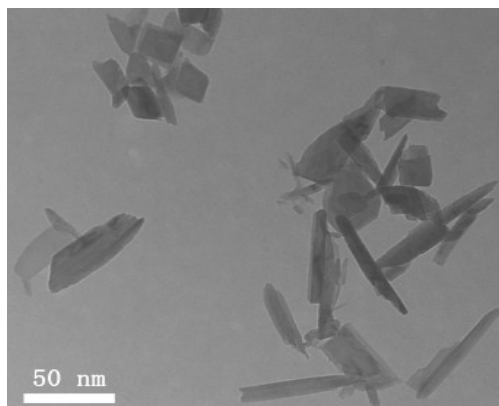

Fig. S5 The TEM image of MoO<sub>3</sub> nanosheets obtained after direct sonication of ground MoO<sub>3</sub> powder. No QDs were found after direct sonication.

## 5. Contrast experiments conducted under 530°C and 600°C

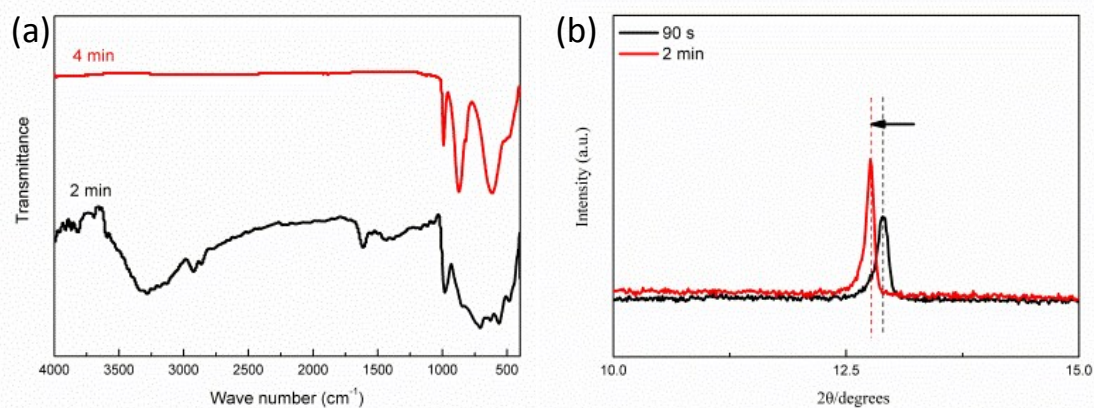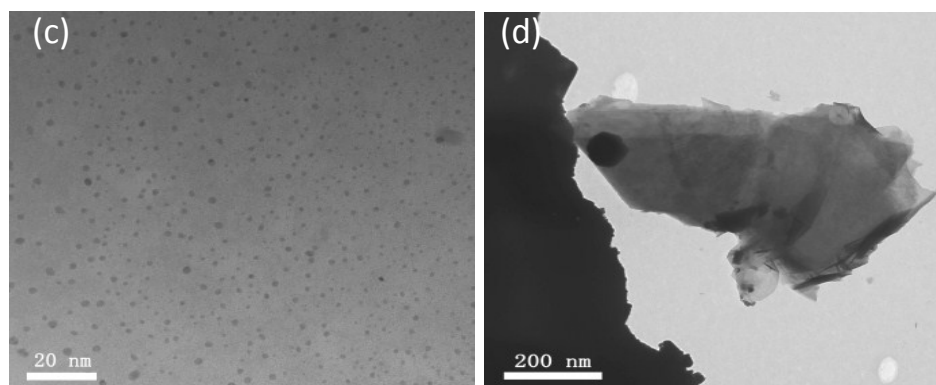

Fig. S6 (a) The IR spectra of the products left after thermal exfoliation under 530°C for different time. After 4 min, the organics had been completely removed. (b) The XRD patterns of the products left after thermal exfoliation under 600°C for different time. After 90 s, the powder had fully turn to  $\alpha$ -MoO<sub>3</sub>. With extension processing time to 2 min, the crystal structure became more well-ordered as XRD peak became more sharp and slightly moved to smaller angle. (c) The TEM image of MoO<sub>3</sub> QDs obtained under 530°C for 4 min. (d) The TEM image of MoO<sub>3</sub> nanosheets obtained with prolonged thermal exfoliation time.

## 6. MoO<sub>3</sub> QDs with irregular shapes

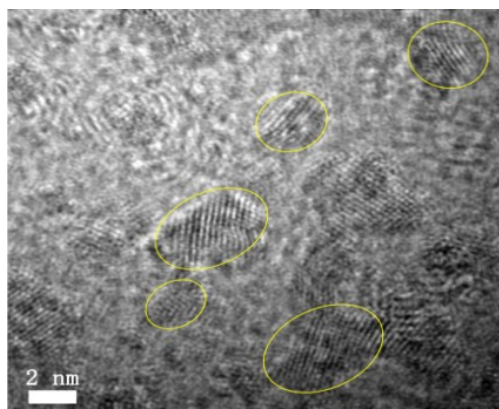

Fig. S7 The HRTEM image of MoO<sub>3</sub> QDs with irregular shapes.
